# Supplementary material
Source: PubMed Central journal article supplement (PMC6549688)
Supplement: NIHMS1018553-supplement-Appendix.pdf [file NIHMS1018553-supplement-Appendix.pdf]

## Supplementary Appendix

This appendix has been provided by the authors to give readers additional information about their work.

Supplement to: Yarchoan M, Hopkins A, Jaffee EM. Tumor mutational burden and response rate to PD-1 inhibition. N Engl J Med 2017;377:2501-2. DOI: 10.1056/NEJMc1713444

# Supplemental Appendix

## Table of Contents

|                           |   |
|---------------------------|---|
| Search Strategy . . . . . | 2 |
| References . . . . .      | 4 |

## List of Tables

|                                                                                                       |   |
|-------------------------------------------------------------------------------------------------------|---|
| S1 List of citations for individual studies used in pooled analysis of objective response rate. . . . | 3 |
|-------------------------------------------------------------------------------------------------------|---|

## Search Strategy

We aimed to identify clinical studies reporting objective response data for PD1 or PDL1 inhibitors in major solid tumor types or subtypes for which median tumor mutation burden (TMB) is known. We initially identified major solid tumor types or subtypes for which TMB has been described<sup>1</sup>. We subsequently conducted electronic searches of MEDLINE (from January 1, 2012 to October 23, 2017), as well as abstracts presented at the American Society of Clinical Oncology (ASCO), the European Society for Medical Oncology (ESMO), and the American Association for Cancer Research (AACR) (Annual Meetings 2012-2017) to identify clinical data for anti-PD1 or anti-PDL1 therapy in each of these cancer types or subtypes. We searched for clinical trials using the specific search terms nivolumab, BMS-936558, pembrolizumab, MK-3475, atezolizumab, MPDL3280A, durvalumab, MEDI4736, avelumab, MSB0010718C, BMS-936559, cemiplimab, and REGN2810. We also contacted experts in the field to locate additional published trials of these agents that may not have been included in our initial electronic search. We excluded studies that enrolled fewer than 10 participants, studies that investigated anti-PD1 therapies only in combination with other agents, and studies that selected patients based on PD-L1 expression or other immune-related biomarkers. Of the remaining studies, only the largest published study for each anti-PD1 therapy was included in the final assessment of pooled ORR for each cancer type or subtype. In tumor types for which phase 3 studies of any anti-PD1 therapy had been conducted, we also excluded other studies enrolling fewer than 40 patients or dose-finding studies with other anti-PD1 agents. The individual studies that comprise the pooled ORR for each cancer type or subtype are presented in Table S1 below.

| Cancer Type                       | Nivolumab | Pembrolizumab | Atezolizumab | Durvalumab | Avelumab | Cemiplimab | BMS-936559 |
|-----------------------------------|-----------|---------------|--------------|------------|----------|------------|------------|
| Adrenocortical Carcinoma          |           |               |              |            | 2        |            |            |
| Anal Cancer                       | 3         |               |              |            |          |            |            |
| Breast Carcinoma                  |           |               | 4            |            | 5        |            |            |
| Cervical Cancer                   | 6         | 7             |              |            |          |            |            |
| Colorectal Cancer - MMRd          | 8         | 9             |              |            |          |            |            |
| Colorectal Cancer - MMRp          |           | 10            |              |            |          |            |            |
| Cutaneous Squamous Cell Carcinoma |           |               |              |            |          | 11         |            |
| Endometrial Cancer                |           |               | 12           |            |          |            |            |
| Esophagogastric Carcinoma         | 13        | 14            |              |            | 15       |            |            |
| Germ Cell Tumor                   |           | 16            |              |            |          |            |            |
| Glioblastoma                      | 17        |               |              | 18         |          |            |            |
| Head and Neck                     | 19        | 20            |              |            |          |            |            |
| Hepatocellular Carcinoma          | 21        |               |              | 22         |          |            |            |
| Melanoma                          | 23        | 24            |              |            |          |            |            |
| Merkel Cell Carcinoma             | 25        | 26            |              |            | 27       |            |            |
| Mesothelioma                      | 28        |               |              |            | 29       |            |            |
| Non-Small-Cell Lung - Nonsquamous | 30        | 31            | 32           |            | 33       |            |            |
| Non-Small-Cell Lung - Squamous    | 34        | 31            | 32           |            | 33       |            |            |
| Other MMRd                        |           | 9             |              |            |          |            |            |
| Ovarian Cancer                    | 35        |               |              |            | 36       |            | 37         |
| Pancreatic Cancer                 |           |               |              |            |          |            | 37         |
| Prostate Cancer                   | 38        | 39            |              |            | 40       |            |            |
| Renal Cell Carcinoma              | 41        |               | 42           |            |          |            |            |
| Sarcoma                           | 43        | 44            |              |            |          |            |            |
| Small-Cell Lung Cancer            | 45        |               |              |            |          |            |            |
| Urothelial Carcinoma              | 46        | 47            | 48           | 49         | 50       |            |            |
| Uveal Melanoma                    | 51        | 51            | 51           |            |          |            |            |

Table S1: List of citations for individual studies used in pooled analysis of objective response rate.

## References

1. Chalmers ZR, Connelly CF, Fabrizio D, et al. Analysis of 100,000 Human Cancer Genomes Reveals the Landscape of Tumor Mutational Burden. *Genome Medicine* 2017;9:34.
2. Le Tourneau C, Zarwan C, Hoimes C, et al. 913P Avelumab in Patients with Metastatic Adrenocortical Carcinoma (mACC): Results from the JAVELIN Solid Tumor Trial. *Annals of Oncology* 2017;28.
3. Morris VK, Salem ME, Nimeiri H, et al. Nivolumab for Previously Treated Unresectable Metastatic Anal Cancer (NCI9673): A Multicentre, Single-Arm, Phase 2 Study. *The Lancet Oncology* 2017;18:446–453.
4. Schmid P, Cruz C, Braiteh FS, et al. Atezolizumab in Metastatic TNBC (mTNBC): Long-Term Clinical Outcomes and Biomarker Analyses. In: *Proceedings of the 107th Annual Meeting of the American Association for Cancer Research*. Washington, DC, 2017.
5. Dirix LY, Takacs I, Jerusalem G, et al. Avelumab, an Anti-PD-L1 Antibody, in Patients with Locally Advanced or Metastatic Breast Cancer: A Phase 1b JAVELIN Solid Tumor Study. *Breast Cancer Research and Treatment* 2017.
6. Hollebecque A, Meyer T, Moore KN, et al. An Open-Label, Multicohort, Phase I/II Study of Nivolumab in Patients with Virus-Associated Tumors (CheckMate 358): Efficacy and Safety in Recurrent or Metastatic (R/M) Cervical, Vaginal, and Vulvar Cancers. *Journal of Clinical Oncology* 2017;35:5504–5504.
7. Schellens JHM, Marabelle A, Zeigenfuss S, Ding J, Pruitt SK, and Chung HC. Pembrolizumab for Previously Treated Advanced Cervical Squamous Cell Cancer: Preliminary Results from the Phase 2 KEYNOTE-158 Study. *Journal of Clinical Oncology* 2017;35:5514–5514.
8. Overman MJ, McDermott R, Leach JL, et al. Nivolumab in Patients with Metastatic DNA Mismatch Repair-Deficient or Microsatellite Instability-High Colorectal Cancer (CheckMate 142): An Open-Label, Multicentre, Phase 2 Study. *The Lancet. Oncology* 2017;18:1182–1191.
9. Diaz L, Marabelle A, Kim T, et al. 386P Efficacy of Pembrolizumab in Phase 2 KEYNOTE-164 and KEYNOTE-158 Studies of Microsatellite Instability High Cancers. *Annals of Oncology* 2017;28.
10. Le DT, Uram JN, Wang H, et al. PD-1 Blockade in Tumors with Mismatch-Repair Deficiency. *New England Journal of Medicine* 2015;372:2509–2520.
11. Papadopoulos KP, Owonikoko TK, Johnson ML, et al. REGN2810: A Fully Human Anti-PD-1 Monoclonal Antibody, for Patients with Unresectable Locally Advanced or Metastatic Cutaneous Squamous Cell Carcinoma (CSCC)—Initial Safety and Efficacy from Expansion Cohorts (ECs) of Phase I Study. *Journal of Clinical Oncology* 2017;35:9503–9503.
12. Fleming GF, Emens LA, Eder JP, et al. Clinical Activity, Safety and Biomarker Results from a Phase Ia Study of Atezolizumab (Atezo) in Advanced/Recurrent Endometrial Cancer (rEC). *Journal of Clinical Oncology* 2017;35:5585–5585.
13. Kang YK, Boku N, Satoh T, et al. Nivolumab in Patients with Advanced Gastric or Gastro-Oesophageal Junction Cancer Refractory to, or Intolerant of, at Least Two Previous Chemotherapy Regimens (ONO-4538-12, ATTRACTION-2): A Randomised, Double-Blind, Placebo-Controlled, Phase 3 Trial. *The Lancet* 2017.
14. Fuchs CS, Doi T, Jang RWJ, et al. KEYNOTE-059 Cohort 1: Efficacy and Safety of Pembrolizumab (Pembro) Monotherapy in Patients with Previously Treated Advanced Gastric Cancer. *Journal of Clinical Oncology* 2017;35:4003–4003.
15. Chung HC, Arkenau HT, Wyrwicz L, et al. Avelumab (MSB0010718C; Anti-PD-L1) in Patients with Advanced Gastric or Gastroesophageal Junction Cancer from JAVELIN Solid Tumor Phase Ib Trial: Analysis of Safety and Clinical Activity. *Journal of Clinical Oncology* 2016;34:4009–4009.
16. Adra N, Althouse SK, Ammakkanavar NR, et al. Phase II Trial of Pembrolizumab in Patients (Pts) with Incurable Platinum Refractory Germ Cell Tumors (GCT). *Journal of Clinical Oncology* 2017;35:4520–4520.

17. Reardon D, Omuro A, Brandes AA, et al. OS10.3 Randomized Phase 3 Study Evaluating the Efficacy and Safety of Nivolumab vs Bevacizumab in Patients With Recurrent Glioblastoma: CheckMate 143. *Neuro-Oncology* 2017;19:iii21–iii21.
18. Reardon DA, Kaley TJ, Dietrich J, et al. Phase 2 Study to Evaluate Safety and Efficacy of MEDI4736 (Durvalumab [DUR]) in Glioblastoma (GBM) Patients: An Update. *Journal of Clinical Oncology* 2017;35:2042–2042.
19. Ferris RL, Blumenschein G, Fayette J, et al. Nivolumab for Recurrent Squamous-Cell Carcinoma of the Head and Neck. *The New England Journal of Medicine* 11 10, 2016;375:1856–1867.
20. Bauml J, Seiwert TY, Pfister DG, et al. Pembrolizumab for Platinum- and Cetuximab-Refractory Head and Neck Cancer: Results From a Single-Arm, Phase II Study. *Journal of Clinical Oncology: Official Journal of the American Society of Clinical Oncology* 2017;35:1542–1549.
21. El-Khoueiry AB, Sangro B, Yau T, et al. Nivolumab in Patients with Advanced Hepatocellular Carcinoma (CheckMate 040): An Open-Label, Non-Comparative, Phase 1/2 Dose Escalation and Expansion Trial. *Lancet (London, England)* 2017;389:2492–2502.
22. Wainberg ZA, Segal NH, Jaeger D, et al. Safety and Clinical Activity of Durvalumab Monotherapy in Patients with Hepatocellular Carcinoma (HCC). *Journal of Clinical Oncology* 2017;35:4071–4071.
23. Larkin J, Chiarion-Sileni V, Gonzalez R, et al. Combined Nivolumab and Ipilimumab or Monotherapy in Untreated Melanoma. *The New England Journal of Medicine* 2015;373:23–34.
24. Robert C, Schachter J, Long GV, et al. Pembrolizumab versus Ipilimumab in Advanced Melanoma. *New England Journal of Medicine* 2015;372:2521–2532.
25. Topalian SL, Bhatia S, Hollebecque A, et al. Abstract CT074: Non-Comparative, Open-Label, Multiple Cohort, Phase 1/2 Study to Evaluate Nivolumab (NIVO) in Patients with Virus-Associated Tumors (CheckMate 358): Efficacy and Safety in Merkel Cell Carcinoma (MCC). *Cancer Research* 2017;77:CT074–CT074.
26. Nghiem PT, Bhatia S, Lipson EJ, et al. PD-1 Blockade with Pembrolizumab in Advanced Merkel-Cell Carcinoma. *The New England Journal of Medicine* 2016;374:2542–2552.
27. Kaufman HL, Russell JS, Hamid O, et al. Durable Responses to Avelumab (Anti-PD-L1) in Patients with Merkel Cell Carcinoma Progressed after Chemotherapy: 1-Year Efficacy Update. In: *Proceedings of the 107th Annual Meeting of the American Association for Cancer Research*. 2017.
28. Scherpereel A, Mazieres J, Greillier L, et al. Second- or Third-Line Nivolumab (Nivo) versus Nivo plus Ipilimumab (Ipi) in Malignant Pleural Mesothelioma (MPM) Patients: Results of the IFCT-1501 MAPS2 Randomized Phase II Trial. *Journal of Clinical Oncology* 2017;35:LBA8507–LBA8507.
29. Hassan R, Thomas A, Patel MR, et al. Avelumab (MSB0010718C; Anti-PD-L1) in Patients with Advanced Unresectable Mesothelioma from the JAVELIN Solid Tumor Phase Ib Trial: Safety, Clinical Activity, and PD-L1 Expression. *Journal of Clinical Oncology* 2016;34:8503–8503.
30. Borghaei H, Paz-Ares L, Horn L, et al. Nivolumab versus Docetaxel in Advanced Nonsquamous Non-Small-Cell Lung Cancer. *New England Journal of Medicine* 2015;373:1627–1639.
31. Garon EB, Rizvi NA, Hui R, et al. Pembrolizumab for the Treatment of Non-Small-Cell Lung Cancer. *New England Journal of Medicine* 2015;372:2018–2028.
32. Rittmeyer A, Barlesi F, Waterkamp D, et al. Atezolizumab versus Docetaxel in Patients with Previously Treated Non-Small-Cell Lung Cancer (OAK): A Phase 3, Open-Label, Multicentre Randomised Controlled Trial. *Lancet (London, England)* 2017;389:255–265.
33. Gulley JL, Rajan A, Spigel DR, et al. Avelumab for Patients with Previously Treated Metastatic or Recurrent Non-Small-Cell Lung Cancer (JAVELIN Solid Tumor): Dose-Expansion Cohort of a Multicentre, Open-Label, Phase 1b Trial. *The Lancet. Oncology* 2017;18:599–610.
34. Brahmer J, Reckamp KL, Baas P, et al. Nivolumab versus Docetaxel in Advanced Squamous-Cell Non-Small-Cell Lung Cancer. *New England Journal of Medicine* 2015;373:123–135.

35. Hamanishi J, Mandai M, Ikeda T, et al. Safety and Antitumor Activity of Anti-PD-1 Antibody, Nivolumab, in Patients With Platinum-Resistant Ovarian Cancer. *Journal of Clinical Oncology* 2015;33:4015–4022.
36. Disis ML, Patel MR, Pant S, et al. Avelumab (MSB0010718C; Anti-PD-L1) in Patients with Recurrent/Refractory Ovarian Cancer from the JAVELIN Solid Tumor Phase Ib Trial: Safety and Clinical Activity. *Journal of Clinical Oncology* 2016;34:5533–5533.
37. Brahmer JR, Tykodi SS, Chow LQ, et al. Safety and Activity of Anti-PD-L1 Antibody in Patients with Advanced Cancer. *New England Journal of Medicine* 2012;366:2455–2465.
38. Topalian SL, Hodi FS, Brahmer JR, et al. Safety, Activity, and Immune Correlates of Anti-PD-1 Antibody in Cancer. *New England Journal of Medicine* 2012;366:2443–2454.
39. Graff JN, Alumkal JJ, Drake CG, et al. Early Evidence of Anti-PD-1 Activity in Enzalutamide-Resistant Prostate Cancer. *Oncotarget* 2016;7:52810–52817.
40. Fakhrejahani F, Madan RA, Dahut WL, et al. Avelumab in Metastatic Castration-Resistant Prostate Cancer (mCRPC). *Journal of Clinical Oncology* 2017;35:159–159.
41. Motzer RJ, Escudier B, McDermott DF, et al. Nivolumab versus Everolimus in Advanced Renal-Cell Carcinoma. *New England Journal of Medicine* 2015;373:1803–1813.
42. McDermott DF, Sosman JA, Sznol M, et al. Atezolizumab, an Anti-Programmed Death-Ligand 1 Antibody, in Metastatic Renal Cell Carcinoma: Long-Term Safety, Clinical Activity, and Immune Correlates From a Phase Ia Study. *Journal of Clinical Oncology* 2016;34:833–842.
43. D’Angelo SP, Mahoney MR, Tine BAV, et al. A Multi-Center Phase II Study of Nivolumab +/- Ipilimumab for Patients with Metastatic Sarcoma (Alliance A091401). *Journal of Clinical Oncology* 2017;35:11007–11007.
44. Tawbi HA, Burgess M, Bolejack V, et al. Pembrolizumab in Advanced Soft-Tissue Sarcoma and Bone Sarcoma (SARC028): A Multicentre, Two-Cohort, Single-Arm, Open-Label, Phase 2 Trial. *The Lancet Oncology* 2017.
45. Hellmann MD, Ott PA, Zugazagoitia J, et al. Nivolumab (Nivo) ± Ipilimumab (Ipi) in Advanced Small-Cell Lung Cancer (SCLC): First Report of a Randomized Expansion Cohort from CheckMate 032. *Journal of Clinical Oncology* 2017;35:8503–8503.
46. Sharma P, Retz M, Siefker-Radtke A, et al. Nivolumab in Metastatic Urothelial Carcinoma after Platinum Therapy (CheckMate 275): A Multicentre, Single-Arm, Phase 2 Trial. *The Lancet Oncology* 2017;18:312–322.
47. Bellmunt J, de Wit R, Vaughn DJ, et al. Pembrolizumab as Second-Line Therapy for Advanced Urothelial Carcinoma. *New England Journal of Medicine* 2017;376:1015–1026.
48. Rosenberg JE, Hoffman-Censits J, Powles T, et al. Atezolizumab in Patients with Locally Advanced and Metastatic Urothelial Carcinoma Who Have Progressed Following Treatment with Platinum-Based Chemotherapy: A Single-Arm, Multicentre, Phase 2 Trial. *The Lancet* 2016;387:1909–1920.
49. Powles T, O’Donnell PH, Massard C, et al. Efficacy and Safety of Durvalumab in Locally Advanced or Metastatic Urothelial Carcinoma: Updated Results From a Phase 1/2 Open-Label Study. *JAMA Oncology* 2017;3:e172411.
50. Apolo AB, Infante JR, Balmanoukian A, et al. Avelumab, an Anti-Programmed Death-Ligand 1 Antibody, In Patients With Refractory Metastatic Urothelial Carcinoma: Results From a Multicenter, Phase Ib Study. *Journal of Clinical Oncology* 2017;35:2117–2124.
51. Algazi AP, Tsai KK, Shoushtari AN, et al. Clinical Outcomes in Metastatic Uveal Melanoma Treated with PD-1 and PD-L1 Antibodies. *Cancer* 2016;122:3344–3353.
